# Supplementary material
Source: MDPI journal article supplement (https://www.mdpi.com/2571-841X/4/3/29)
Supplement: s1 [file s1]

Supplementary materials

# A Locally Advanced Endometrioid Adenocarcinoma Arising from Vaginal Endometriosis: Management and Review of the Literature

Mariangela Costanza <sup>1</sup>, Fernanda Herrera <sup>1</sup>, Delfyne Hastir <sup>2</sup>, Patrice Mathevet <sup>3</sup> and Apostolos Sarivalasis <sup>1,\*</sup>

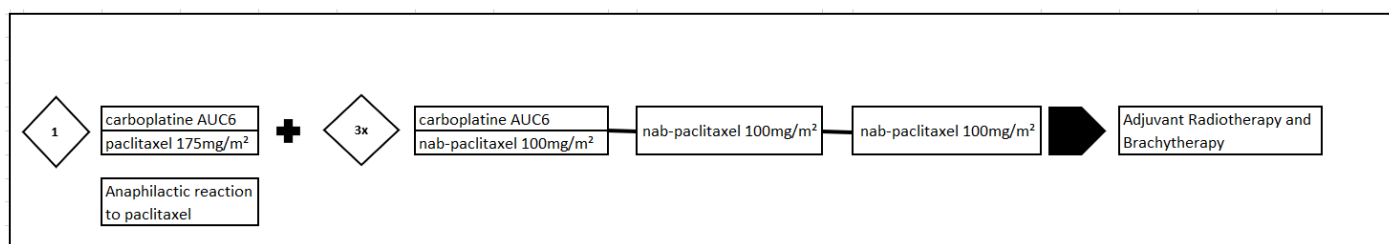

**Figure S1.** Adjuvant treatment. Overview of the sequential adjuvant treatment of the patient including chemotherapy and radiotherapy with brachytherapy.

**Table S1.** Treatment-related adverse events. Hematological and non-hematological adverse events observed during adjuvant treatment.

| Hematological       |                           | Non-Hematological  |                           |
|---------------------|---------------------------|--------------------|---------------------------|
| Adverse Events      | Grade (max.)<br>CTCEAv5.0 | Adverse Events     | Grade (max.)<br>CTCEAv5.0 |
| Leukopenia          | 3                         | Fatigue            | 2                         |
| Neutropenia         | 4                         | Nausea             | 1                         |
| Febrile Neutropenia | 0                         | Diarrhea           | 1                         |
| Anemia              | 3                         | Mucositis          | 1                         |
| Thrombocytopenia    | 3                         | Sensory Neuropathy | 1                         |
